# Supplementary material for: Predicting High Coronary Artery Calcium Score From Retinal Fundus Images With Deep Learning Algorithms
Source: PubMed Central journal article supplement — Transl Vis Sci Technol. 2020 Nov 11;9(6):28. doi: 10.1167/tvst.9.2.28 (PMC7410115; doi:10.1167/tvst.9.2.28), 2020-11-11
Supplement: tvst-9-2-28_s002.pdf [file tvst-9-2-28_s002.pdf]

## Neural Network Architecture for the Both Eyes

**Table S1.** Neural network architecture for analyzing both eyes.

| Layer        | Operation                                          | Output    |
|--------------|----------------------------------------------------|-----------|
| input1       | -                                                  | 512x512x3 |
| input2       | -                                                  | 512x512x3 |
| feature map1 | feature map of the neural network for a single eye | 16x16x512 |
| feature map2 | feature map of the neural network for a single eye | 16x16x512 |
| pool1        | global average pool                                | 512       |
| pool2        | global average pool                                | 512       |
| concat       | concatenate pool1 and pool2                        | 1024      |
| dense1       | fully connected                                    | 32        |
| dense2       | fully connected                                    | 1         |
| output       | sigmoid                                            | 1         |
