# Supplementary material for: Predicting High Coronary Artery Calcium Score From Retinal Fundus Images With Deep Learning Algorithms
Source: PubMed Central journal article supplement — Transl Vis Sci Technol. 2020 Nov 11;9(6):28. doi: 10.1167/tvst.9.2.28 (PMC7410115; doi:10.1167/tvst.9.2.28), 2020-11-11
Supplement: tvst-9-2-28_s003.pdf [file tvst-9-2-28_s003.pdf]

## Neural Network Architecture for Fundus + Non-retinal Information

**Table S2.** Neural network architecture for a fundus image and Non-retinal information (age + gender + hypertension). The coefficients of 0.9 and 0.1 were selected from grid search from [0, 1] with an interval of 0.1 based on validation AUROC. Input 1 and Input 2 represent a fundus image and concatenated non-retinal information (age + gender + hypertension).

| Layer        | Operation                                              | Output    |
|--------------|--------------------------------------------------------|-----------|
| input1       | -                                                      | 512x512x3 |
| input2       | -                                                      | 3x1       |
| fundus model | logistic output of the neural network for a single eye | 1x1       |
| aux model    | logistic regression                                    | 1x1       |
| ensemble     | $0.9 * \text{out\_aux} + 0.1 * \text{out\_fundus}$     | 1x1       |
| output       | sigmoid                                                | 1         |
