# Supplementary material for: Predicting High Coronary Artery Calcium Score From Retinal Fundus Images With Deep Learning Algorithms
Source: PubMed Central journal article supplement — Transl Vis Sci Technol. 2020 Nov 11;9(6):28. doi: 10.1167/tvst.9.2.28 (PMC7410115; doi:10.1167/tvst.9.2.28), 2020-11-11
Supplement: tvst-9-2-28_s004.pdf [file tvst-9-2-28_s004.pdf]

## Comparison between Convolutional Neural Network Architectures

**Table S3.** Comparison of performance between different convolutional neural network architectures on the binary task of classifying CACS > 100 from no CAC. VGG-16, ResNet-50, and Inception-v3 were trained with their own ImageNet-pretrained weights, which are all available in Keras deep learning library. Fully connected layers were converted to have a 1-dimensional output to adjust to the binary classification problem. AUROC was measured under a 5-fold setting and empirical mean and empirical standard deviation are reported. No significant difference existed between architectures.

| Architecture | AUROC - mean (std) | # parameters |
|--------------|--------------------|--------------|
| VGG-16       | 82.0 % (2.4 %)     | 14,715,201   |
| ResNet-50    | 82.0 % (2.5 %)     | 23,589,761   |
| Inception-v3 | 82.3 % (2.7 %)     | 21,804,833   |
